# Supplementary material for: Noisy condition and three-point shot performance in skilled basketball players: the limited effect of self-talk
Source: Front Sports Act Living. 2024 Jan 10;5:1304911. doi: 10.3389/fspor.2023.1304911 (PMC10806114; doi:10.3389/fspor.2023.1304911)
Supplement: Supplementary file 1 [file Table1.xlsx]

## Sheet: Sheet1
number	age	PBY	THPW	intervention(1CG,2MST,3IST)	Item1	Item2	static_shot1	static_shot2	static_shot3	static_shot4	dynamic_shot1	dynamic_shot2	dynamic_shot3	dynamic_shot4	free_throw	static_shot_mean	noise_static_shot_mean	dynamic_shot_mean	noise_dynamic_shot_mean
1	19	10	10	3	1	4	24	21	25	32	18	16	35	30	72	28	23	24	25.5
2	22	8	10	3	1	4	32	29	27	24	39	23	27	27	68	28	28	33	25
3	19	7	12	2	4	3	30	21	28	31	45	37	37	45	67	30.5	24.5	45	37
4	20	12	18	2	4	2	35	33	35	28	44	50	46	50	79	31.5	34	47	48
5	20	6	12	1	2	2	37	27	34	37	29	40	38	31	87	37	30.5	30	39
6	25	10	3	3	1	5	36	34	34	37	39	50	47	46	84	36.5	34	42.5	48.5
7	25	13	5	1	1	1	34	34	27	31	48	32	31	50	86	32.5	30.5	49	31.5
8	28	13	10	2	5	1	30	35	30	34	49	51	44	60	70	32	32.5	54.5	47.5
9	19	3	12	3	1	3	30	30	30	30	48	58	50	54	78	30	30	51	54
10	20	3	12	1	1	3	24	27	29	28	48	56	52	48	63	26	28	48	54
11	23	5	8	1	4	3	29	26	26	26	49	47	53	55	65	27.5	26	52	50
12	20	5	11	2	3	1	30	23	30	29	54	50	53	55	69	29.5	26.5	54.5	51.5
13	20	13	12	3	1	3	22	34	24	30	43	56	46	45	77	26	29	44	51
14	19	2	4	2	4	1	29	27	34	34	47	41	44	43	70	31.5	30.5	45	42.5
15	19	5	7	2	4	1	36	35	29	33	64	81	69	65	83	34.5	32	64.5	75
16	24	8	6	3	1	3	29	30	27	28	60	42	35	38	67	28.5	28.5	49	38.5
17	20	2	12	1	1	1	27	34	19	16	47	34	28	38	67	21.5	26.5	42.5	31
18	19	2	12	2	5	1	35	25	30	32	42	60	38	49	71	33.5	27.5	45.5	49
19	20	5	12	3	1	4	32	30	25	37	71	65	74	60	74	34.5	27.5	65.5	69.5
20	18	18	8	1	2	3	25	23	25	27	51	58	53	57	68	26	24	54	55.5
21	21	4	7	2	5	1	30	32	24	21	54	46	46	48	65	25.5	28	51	46
22	21	9	7	3	2	4	26	24	23	29	51	52	54	47	52	27.5	23.5	49	53
23	19	8	12	2	3	1	23	24	25	24	45	46	52	50	58	23.5	24.5	47.5	49
24	19	9	17	3	3	4	27	15	23	22	33	40	34	37	57	24.5	19	35	37
25	24	7	5	1	2	2	33	29	30	39	51	61	53	59	68	36	29.5	55	57
26	23	9	6	1	2	3	25	27	25	31	49	53	57	52	76	28	26	50.5	55
27	23	10	2	2	5	2	27	31	23	28	60	48	48	53	69	27.5	27	56.5	48
28	19	3	20	2	5	1	27	28	28	27	50	55	55	50	78	27	28	50	55
29	19	7	32	3	3	5	29	38	37	22	47	73	60	61	90	25.5	37.5	54	66.5
30	19	7	32	2	5	1	34	30	23	22	45	49	55	55	69	28	26.5	50	52
31	19	3	15	1	2	3	23	25	28	29	37	48	44	39	59	26	26.5	38	46
32	19	9	7	1	1	1	26	29	33	30	50	58	56	52	70	38	31	51	57
33	18	6	3	3	1	4	29	30	22	27	47	49	42	37	72	28	26	42	45.5
34	20	4	12	2	5	1	38	31	33	33	64	59	74	52	70	35.5	32	58	66.5
35	25	20	5	3	1	4	33	34	25	31	57	52	52	66	64	32	29.5	61.5	52
36	27	12	12	3	1	5	30	32	22	36	54	49	52	46	65	33	27	50	50.5
37	19	10	12	1	1	1	30	24	29	34	57	44	55	61	77	32	26.5	59	49.5
38	21	7	9	3	1	5	40	31	32	25	50	59	46	50	75	32.5	31.5	50	52.5
39	22	10	12	1	1	1	29	16	34	32	50	48	46	51	68	30.5	25	50.5	47
40	21	3	12	2	4	1	23	31	22	22	40	42	43	43	63	22.5	26.5	41.5	42.5
41	19	6	12	1	1	1	24	27	23	28	44	48	42	46	69	26	25	45	45
42	23	4	12	1	1	1	36	34	33	28	50	56	54	50	65	32	33.5	50	55
